# Supplementary material for: Effect of HBr formation on mercury oxidation via CaBr2 addition to coal during combustion
Source: Royal Society of Chemistry journal article supplement (doi:10.1039/c6ra11468g), 2016-01-01
Supplement: c6ra11468g1.pdf [file c6ra11468g1.pdf]

### Supporting Information

#### Effect of HBr formation on mercury oxidation via CaBr<sub>2</sub> addition to coal during combustion

Yang Yang<sup>a,b</sup>, Wenqing Xu<sup>a,\*</sup>, Yinghong Wu<sup>a,b</sup>, Jin Xiong<sup>a,b</sup>, Tingyu Zhu<sup>a,\*</sup>, Xuan Zhou<sup>a</sup>, Li Tong<sup>a,b</sup>

<sup>a</sup> Research Center of Process Pollution Control, National Engineering Laboratory for Hydrometallurgical Cleaner Production Technology, Institute of Process Engineering, Chinese Academy of Sciences, Beijing 100190, China

<sup>b</sup> University of Chinese Academy of Sciences, Beijing 100049, China

\*Corresponding author: Tingyu Zhu, Wenqing Xu

Research Center of Process Pollution Control, National Engineering Laboratory for Hydrometallurgical Cleaner Production Technology, Institute of Process Engineering, Chinese Academy of Sciences, Beijing 100190, China

E-mail: tyzhu@home.ipe.ac.cn;

Fax: 86-10-82544822; Tel: 86-10-82544821

Operator:Lenovo Timebase:ICS-1100 Sequence:20140516-15MM KOH-4MIN-标

### Integration

|                  |                     |                   |          |
|------------------|---------------------|-------------------|----------|
| Sample Name:     | 272                 | Injection Volume: | 25.0     |
| Sample Type:     | unknown             | Channel:          | ECD_1    |
| Control Program: | 15mM KOH-4Min-15无梯度 | Instrument:       | ICS-1100 |
| Quantif. Method: | TEST                | Column:           | AS19     |
| Recording Time:  | #####               | Dilution Factor:  | 50.0000  |
| Run Time (min):  | 15.00               | Sample Weight:    | 0.1137   |

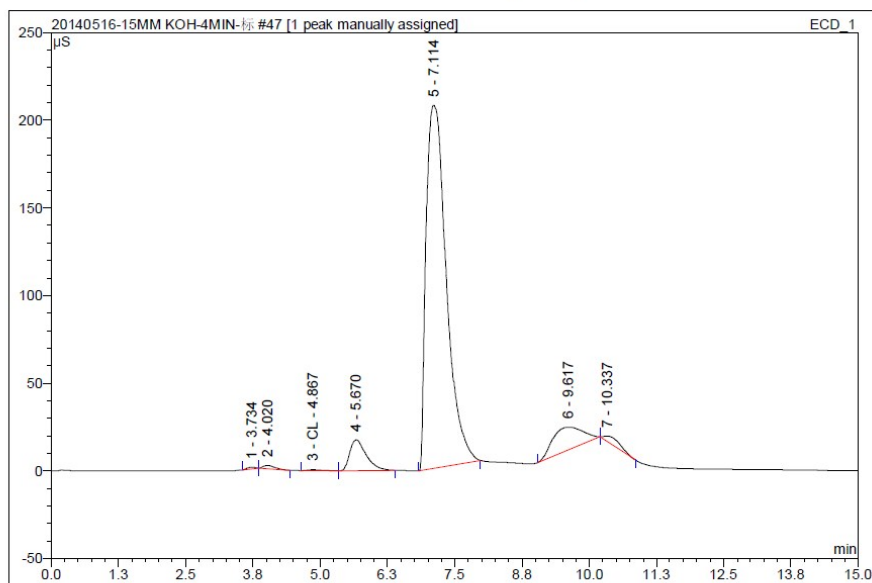

| No.           | Ret.Time<br>min | Peak Name | Height<br>µS | Area<br>µS*s | Rel.Area<br>% | Amount<br>mg/kg | S/N   | Plates(EP) |
|---------------|-----------------|-----------|--------------|--------------|---------------|-----------------|-------|------------|
| 1             | 3.73            | n.a.      | 0.9435       | 9.69         | 0.15          | n.a.            | 4.3   | 2657       |
| 2             | 4.02            | n.a.      | 1.8623       | 27.04        | 0.42          | n.a.            | 8.4   | 1712       |
| 3             | 4.87            | CL        | 0.5935       | 9.83         | 0.15          | 151.34          | 2.7   | 2002       |
| 4             | 5.67            | n.a.      | 17.5660      | 373.51       | 5.82          | n.a.            | 79.2  | 1704       |
| 5             | 7.11            | n.a.      | 207.1474     | 5396.35      | 84.13         | n.a.            | 485.3 | 1729       |
| 6             | 9.62            | n.a.      | 12.9273      | 511.43       | 7.97          | n.a.            | 5.9   | 1201       |
| 7             | 10.34           | n.a.      | 3.1566       | 86.69        | 1.35          | n.a.            | 1.4   | 3807       |
| <b>Total:</b> |                 |           | 244.197      | 6414.531     | 100.00        | 151.335         |       |            |

ICS打印报告模板/Integration

Chromeleon (c) Dionex 1996-2001  
Version 6.80 SR11 Build 3160 (183147)

PDF 文件使用 "pdfFactory Pro" 试用版本创建 [www.fineprint.cn](http://www.fineprint.cn)

Fig S1 Test report of anthracite

Operator:Lenovo Timebase:ICS-1100 Sequence:20140516-15MM KOH-4MIN-标

| Integration      |                     |                   |          |
|------------------|---------------------|-------------------|----------|
| Sample Name:     | 129                 | Injection Volume: | 25.0     |
| Sample Type:     | unknown             | Channel:          | ECD_1    |
| Control Program: | 15mM KOH-4Min-15无梯度 | Instrument:       | ICS-1100 |
| Quantif. Method: | TEST                | Column:           | AS19     |
| Recording Time:  | #####               | Dilution Factor:  | 50.0000  |
| Run Time (min):  | 15.00               | Sample Weight:    | 0.0852   |

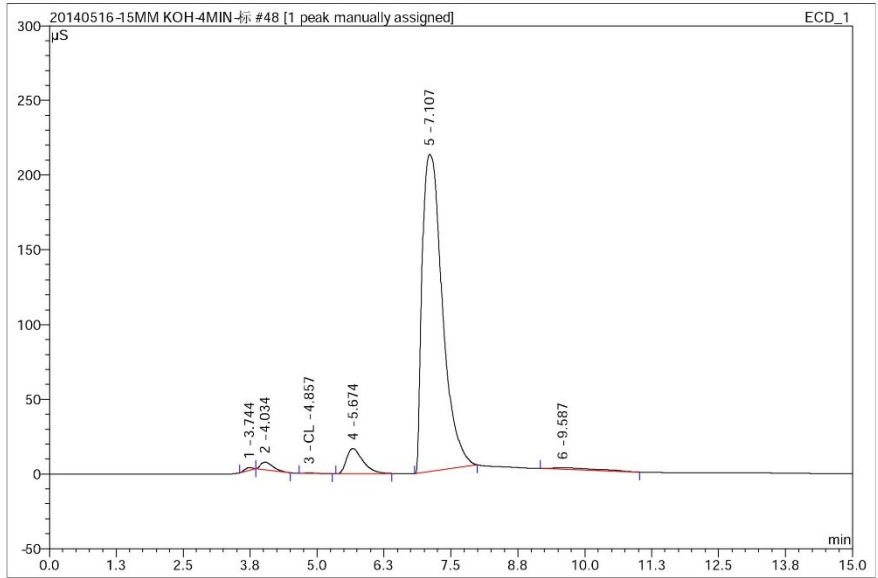

| No.           | Ret.Time<br>min | Peak Name | Height<br>µS | Area<br>µS*s | Rel.Area<br>% | Amount<br>mg/kg | S/N   | Plates(EP) |
|---------------|-----------------|-----------|--------------|--------------|---------------|-----------------|-------|------------|
| 1             | 3.74            | n.a.      | 1.7910       | 19.20        | 0.31          | n.a.            | 5.8   | 2550       |
| 2             | 4.03            | n.a.      | 5.1436       | 80.96        | 1.33          | n.a.            | 16.6  | 1482       |
| 3             | 4.86            | CL        | 0.4556       | 6.96         | 0.11          | 143.08          | 1.5   | 2247       |
| 4             | 5.67            | n.a.      | 16.8878      | 358.53       | 5.88          | n.a.            | 54.4  | 1709       |
| 5             | 7.11            | n.a.      | 212.2050     | 5562.01      | 91.19         | n.a.            | 796.7 | 1706       |
| 6             | 9.59            | n.a.      | 1.0226       | 71.43        | 1.17          | n.a.            | 10.4  | 313        |
| <b>Total:</b> |                 |           | 237.506      | 6099.083     | 100.00        | 143.080         |       |            |

Fig S2 Test report of Lignite

Operator:Lenovo Timebase:ICS-1100 Sequence:20140516-15MM KOH-4MIN-标

| Integration      |                     |                   |          |
|------------------|---------------------|-------------------|----------|
| Sample Name:     | 334                 | Injection Volume: | 25.0     |
| Sample Type:     | unknown             | Channel:          | ECD_1    |
| Control Program: | 15mM KOH-4Min-15无梯度 | Instrument:       | ICS-1100 |
| Quantif. Method: | TEST                | Column:           | AS19     |
| Recording Time:  | #####               | Dilution Factor:  | 50.0000  |
| Run Time (min):  | 15.00               | Sample Weight:    | 0.1100   |

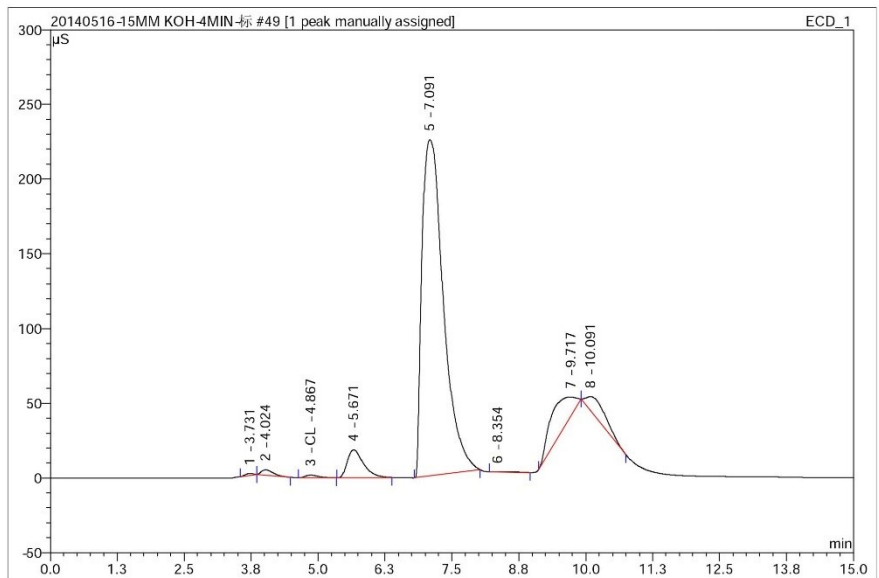

| No.           | Ret.Time<br>min | Peak Name | Height<br>µS | Area<br>µS*s | Rel.Area<br>% | Amount<br>mg/kg | S/N  | Plates(EP) |
|---------------|-----------------|-----------|--------------|--------------|---------------|-----------------|------|------------|
| 1             | 3.73            | n.a.      | 1.2734       | 12.98        | 0.17          | n.a.            | 3.6  | 2705       |
| 2             | 4.02            | n.a.      | 3.6314       | 55.35        | 0.72          | n.a.            | 10.4 | 1555       |
| 3             | 4.87            | CL        | 1.7688       | 29.29        | 0.38          | 466.31          | 5.0  | 2013       |
| 4             | 5.67            | n.a.      | 18.6076      | 390.98       | 5.07          | n.a.            | 53.1 | 1743       |
| 5             | 7.09            | n.a.      | 224.9222     | 6254.64      | 81.08         | n.a.            | 36.2 | 1526       |
| 6             | 8.35            | n.a.      | 0.1474       | 6.48         | 0.08          | n.a.            | 0.0  | 1141       |
| 7             | 9.72            | n.a.      | 13.2629      | 663.89       | 8.61          | n.a.            | 2.1  | 1438       |
| 8             | 10.09           | n.a.      | 9.3751       | 300.86       | 3.90          | n.a.            | 1.5  | 2464       |
| <b>Total:</b> |                 |           | 272.989      | 7714.474     | 100.00        | 466.306         |      |            |

ICS打印报告模板/Integration

Chromeleon (c) Dionex 1996-2001  
Version 6.80 SR11 Build 3160 (183147)

PDF 文件使用文使文使文

试用版本创建文\_\_\_\_\_

Fig S3 Test report of bituminous coal

Table S1 Results of total mercury in coalsamples

| coal samples    | mercury content ( $\mu\text{g}/\text{kg}$ ) |     |     | average ( $\mu\text{g}/\text{kg}$ ) |
|-----------------|---------------------------------------------|-----|-----|-------------------------------------|
|                 | 1                                           | 2   | 3   |                                     |
| lignite         | 198                                         | 203 | 199 | 200 $\pm$ 3                         |
| anthracite      | 95                                          | 103 | 111 | 103 $\pm$ 8                         |
| bituminous coal | 124                                         | 126 | 120 | 124 $\pm$ 3                         |

Table S2 The repeated experiment results of each  $\text{CaBr}_2$  addition

| $\text{CaBr}_2$ addition (ppm)      |   | 0           | 50          | 100         | 200         | 300         | 400         |
|-------------------------------------|---|-------------|-------------|-------------|-------------|-------------|-------------|
| mercury                             | 1 | 187         | 168         | 155         | 116         | 118         | 100         |
| content                             | 2 | 179         | 152         | 140         | 103         | 106         | 113         |
| ( $\mu\text{g}/\text{kg}$ )         | 3 | 184         | 165         | 154         | 108         | 111         | 117         |
| average ( $\mu\text{g}/\text{kg}$ ) |   | 183 $\pm$ 4 | 162 $\pm$ 9 | 150 $\pm$ 8 | 109 $\pm$ 6 | 112 $\pm$ 6 | 110 $\pm$ 8 |
